# Supplementary material for: Effects of organic components in cuttlebone on the morphological and mechanical properties of peroxide cross-linked cuttlebone/natural rubber composites
Source: Royal Society of Chemistry journal article supplement (doi:10.1039/d2ra01885c), 2022-01-01
Supplement: d2ra01885c1.pdf [file d2ra01885c1.pdf]

## Supporting information for the manuscript

### Effect of Organic Components in Cuttlebone on Morphological and Mechanical Properties of Peroxide Cross-linked Cuttlebone/Natural Rubber Composites

Thitipat Chongcharoenchaikul,<sup>a,b,c</sup> Kosuke Miyaji,<sup>a,c</sup> Preeyanuch Junkong,<sup>c,d</sup> Sirilux Poompradub,<sup>\*b,c,e,f</sup> and Yuko Ikeda<sup>\*c,g</sup>

<sup>a</sup> *Graduate School of Science and Technology, Kyoto Institute of Technology, Matsugasaki, Sakyo, Kyoto 606-8585, Japan*

<sup>b</sup> *Department of Chemical Technology, Faculty of Science, Chulalongkorn University, Phatumwan, Bangkok 10330, Thailand*

<sup>c</sup> *Center for Rubber Science and Technology, Kyoto Institute of Technology, Matsugasaki, Sakyo, Kyoto 606-8585, Japan*

<sup>d</sup> *Department of Chemistry, Faculty of Science, Mahidol University, Rama VI Road, Ratchathewee, Bangkok 10400, Thailand*

<sup>e</sup> *Center of Excellence on Petrochemical and Materials Technology, Chulalongkorn University, Phatumwan, Bangkok 10330, Thailand*

<sup>f</sup> *Green Materials for Industrial Application Research Unit, Faculty of Science, Chulalongkorn University, Phatumwan, Bangkok 10330, Thailand*

<sup>g</sup> *Faculty of Molecular Chemistry and Engineering, Kyoto Institute of Technology, Matsugasaki, Sakyo, Kyoto 606-8585, Japan*

\*Corresponding author

E-mail: sirilux.p@chula.ac.th

E-mail: yuko@kit.ac.jp

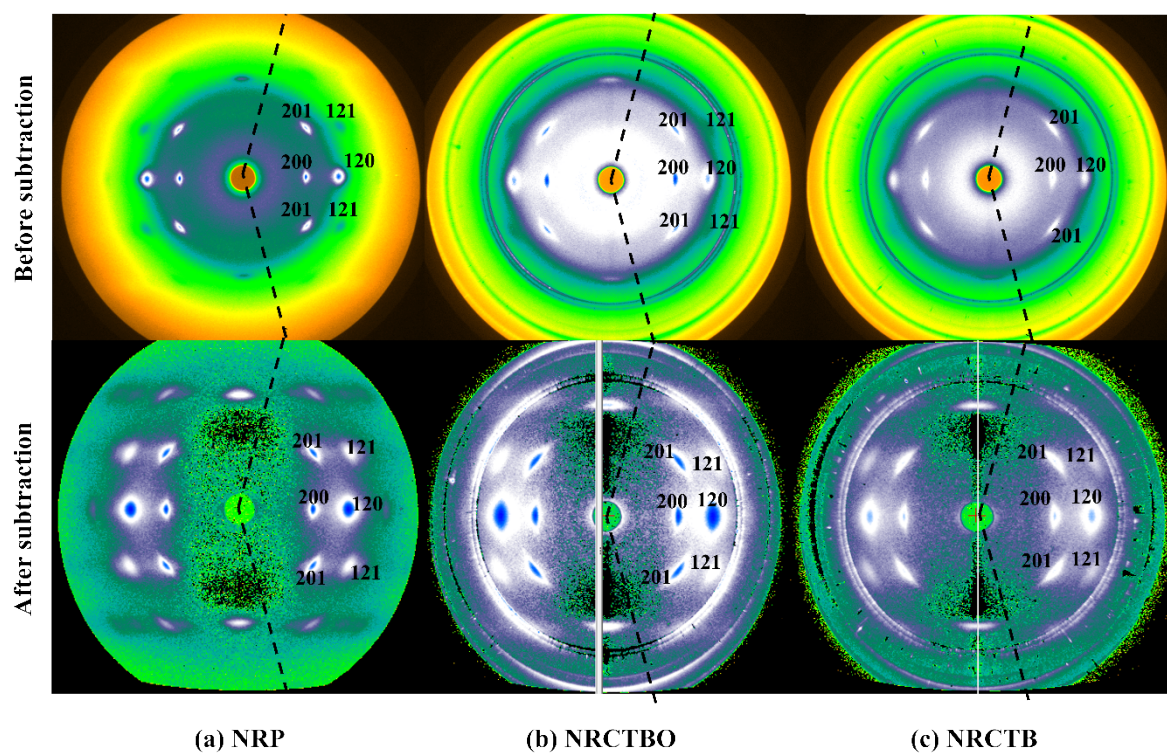

**Fig. S1.** Representative 2D-WAXD images of the (a) NRP, (b) NRCTBO, and (c) NRCTB (Above) before and (Below) after subtraction of the air scattering and unoriented phase at a stretching ratio of 5.75. (Dotted lines represented the integral area for each side, numbers represented the crystallites plane ( $hkl$ ) of rubber chains).
